# Supplementary material
Source: PubMed Central journal article supplement (PMC3603382)

## **Supporting Information**

### **Protein Structure Refinement through Structure Selection and Averaging from Molecular Dynamics Ensembles**

Vahid Mirjalili,<sup>1,2</sup> Michael Feig<sup>1,3\*</sup>

<sup>1</sup>Department of Biochemistry and Molecular Biology

<sup>2</sup>Department of Mechanical Engineering

<sup>3</sup>Department of Chemistry

Michigan State University

East Lansing, MI 48824; USA

**Table S1:** Change in RMSD (Å) and GDT-HA for the structure closest to the subset average relative to their respective values from the initial models.

| Target | 200 ns       |            | 8 × 3 ns     |            |
|--------|--------------|------------|--------------|------------|
|        | Δ RMSD       | Δ GDT-HA   | Δ RMSD       | Δ GDT-HA   |
| TR592  | <b>-0.08</b> | <b>3.1</b> | <b>-0.03</b> | -0.2       |
| TR453  | 0.15         | -0.3       | 0.07         | -0.3       |
| TR432  | <b>-0.20</b> | <b>0.4</b> | <b>-0.11</b> | <b>0.4</b> |
| TR462a | 0.20         | <b>2.7</b> | 0.11         | <b>0.7</b> |
| TR594  | 0.24         | -0.2       | 0.04         | -0.9       |
| TR614  | 0.44         | -1.1       | 0.19         | -2.5       |
| TR435  | 0.26         | -3.8       | 0.08         | -3.3       |
| TR530  | <b>-0.11</b> | -1.6       | <b>-0.09</b> | -2.2       |
| TR488  | <b>-0.14</b> | <b>2.1</b> | <b>-0.07</b> | <b>0.5</b> |
| TR469  | 0.03         | -2.8       | 0.00         | -3.2       |
| TR462b | 0.11         | <b>0.4</b> | 0.08         | <b>0.4</b> |
| TR389  | <b>-0.21</b> | -5.2       | 0.03         | -4.9       |
| TR464  | 0.03         | <b>0.7</b> | 0.04         | -0.4       |
| TR569  | <b>-0.30</b> | -1.0       | <b>-0.03</b> | <b>0.3</b> |
| TR454  | <b>-0.08</b> | <b>1.4</b> | <b>-0.05</b> | -0.1       |
| TR567  | <b>-0.05</b> | <b>2.6</b> | 0.01         | <b>2.8</b> |
| TR574  | 0.79         | <b>0.7</b> | 0.14         | -2.7       |
| TR557  | <b>-0.50</b> | <b>1.4</b> | <b>-0.16</b> | <b>2.2</b> |
| TR429a | <b>-0.11</b> | <b>8.9</b> | 0.03         | <b>2.4</b> |
| TR517  | 0.31         | -1.0       | 0.07         | <b>0.8</b> |
| TR606  | <b>-0.48</b> | <b>1.2</b> | 0.02         | -2.9       |
| TR429b | <b>-0.13</b> | -0.3       | <b>-0.06</b> | <b>0.3</b> |
| TR624  | <b>-0.42</b> | <b>4.0</b> | 0.06         | 0.0        |
| TR568  | <b>-0.06</b> | <b>1.6</b> | 0.22         | <b>0.5</b> |
| TR622  | 0.21         | <b>2.5</b> | 0.39         | -0.6       |
| TR576  | 0.40         | -0.7       | 0.72         | -3.3       |
| Avg.   | 0.01         | <b>0.6</b> | 0.07         | -0.6       |

**Figure S1.** Change in GDT-HA of all CASP8 and CASP9 targets after refinement without imposing restraints using C36ff

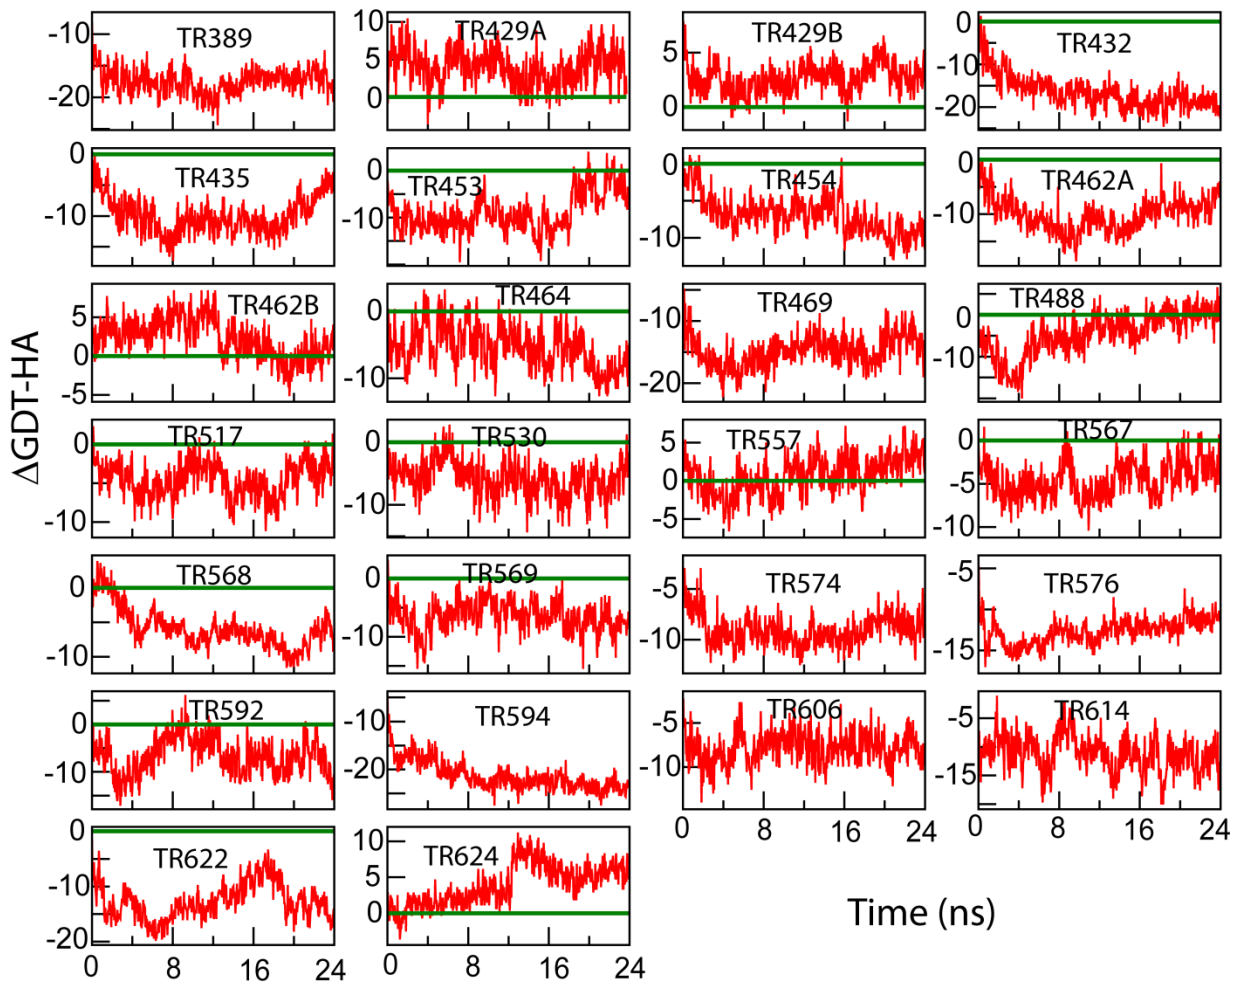

**Figure S2.** Change in GDT-HA vs. time for all targets with 200 ns simulation with imposed restraints

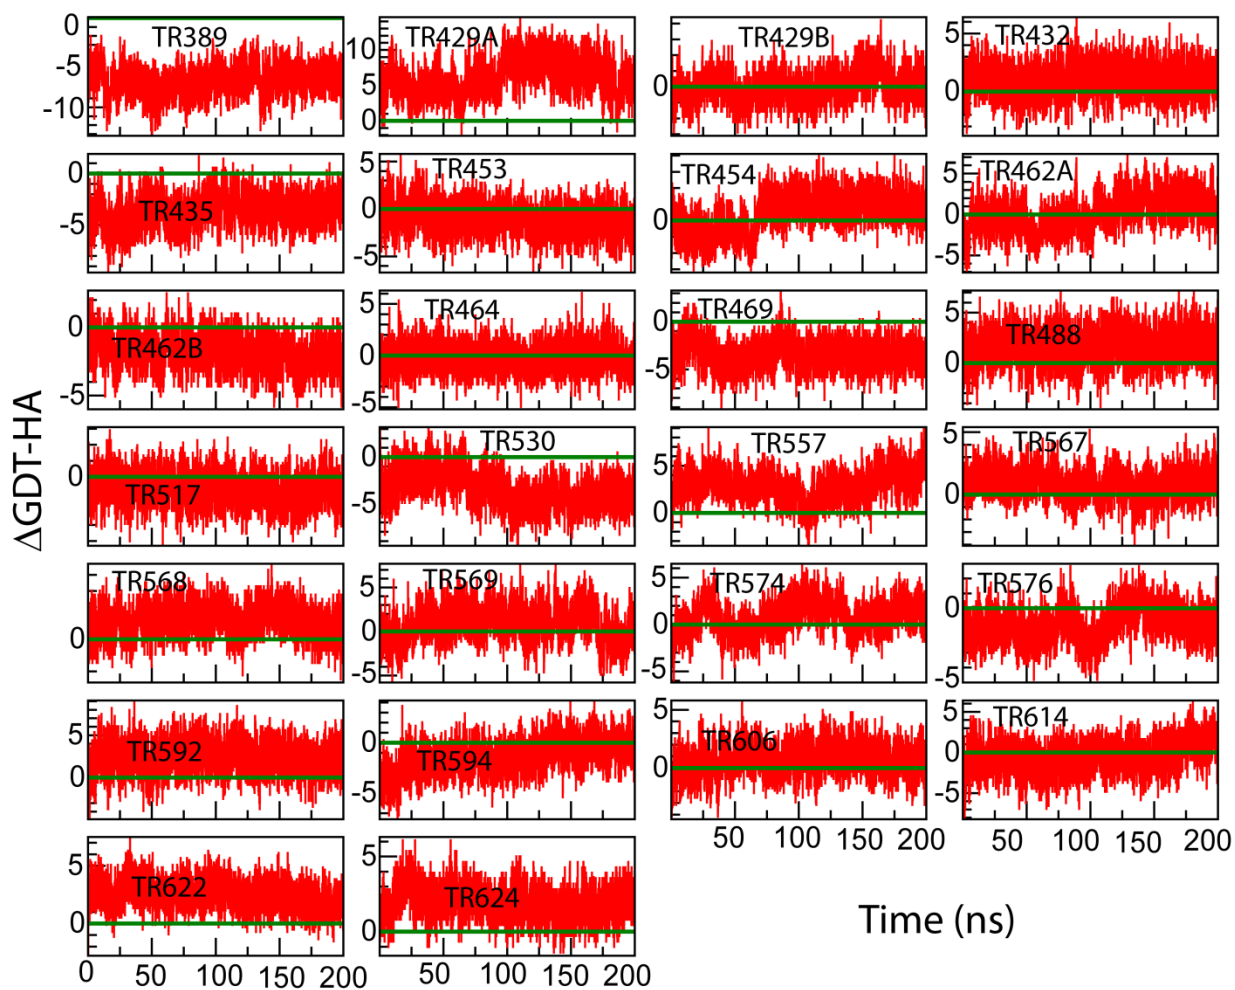

Supplement: NIHMS431842-supplement-1_si_001.pdf [file NIHMS431842-supplement-1_si_001.pdf]
